# Supplementary material
Source: PubMed Central journal article supplement (PMC7735256)

## Online Supplemental Material

### Contents

**Supplemental Table 1.** Adjusted associations of continuous UNGD metrics with heart failure hospitalization status

**Supplemental Table 2.** Adjusted associations of annual peak (from 16-day period of each year) normalized difference vegetation index (NDVI) and sensitivity analyses of primary UNGD models after inclusion of NDVI with heart failure hospitalization status

**Supplemental Table 3.** Adjusted associations of a 30-day composite UNGD metric (z-score sum of pad preparation, spud, stimulation, and production phases) with heart failure hospitalization status

**Supplemental Figure 1.** Schematic of UNGD activity assignment in relation to events (hospitalizations or control encounters), showing the 30-day duration and the 1-day lag in relation to the date of hospitalization or control encounter

**Supplemental Figure 2.** Plot of linear and quadratic associations between the production metric and predicted probability of hospitalization, with 95 % confidence intervals

**Supplemental Table 1.** Adjusted associations of continuous UNGD metrics with heart failure hospitalization status

| <b>UNGD Metric</b>                           | <b>Odds ratio (95% CI)</b><br>per 1 unit increase in natural log of each metric* |
|----------------------------------------------|----------------------------------------------------------------------------------|
| Pad preparation**, 1/m <sup>2</sup>          |                                                                                  |
| <b>Mean-centered</b>                         | <b>1.33 (1.20, 1.47)</b>                                                         |
| <b>Mean-centered-squared</b>                 | 0.95 (0.91, 0.98)                                                                |
| Spud (drilling), 1/m <sup>2</sup>            |                                                                                  |
| Mean-centered                                | 1.13 (0.94, 1.37)                                                                |
| Stimulation, m/m <sup>2</sup>                |                                                                                  |
| Mean-centered                                | <b>1.14 (1.05, 1.24)</b>                                                         |
| Production**, m <sup>3</sup> /m <sup>2</sup> |                                                                                  |
| Mean-centered                                | <b>1.21 (1.11, 1.31)</b>                                                         |
| Mean-centered-squared                        | <b>1.02 (1.01, 1.03)</b>                                                         |

\*Models adjusted for: sex, race/ethnicity, receipt of Medical Assistance, smoking status, BMI (centered and centered-squared), age category, season, contact time, distance to hospital or clinic, year, and region.

\*\*Results are reported for both the mean-centered metric and the mean-centered-squared metric separately only if quadratic term was statistically significant.

**Supplemental Table 2.** Adjusted associations of annual peak (for 16-day period each year) normalized difference vegetation index (NDVI) and sensitivity analyses of primary UNGD models after inclusion of NDVI with heart failure hospitalization status

| UNGD Metric                                                            | Odds ratio (95% CI)      |
|------------------------------------------------------------------------|--------------------------|
| <b>Model 1a</b>                                                        |                          |
| NDVI*, unitless                                                        | <b>0.94 (0.89, 0.99)</b> |
| <b>Model 1b</b>                                                        |                          |
| NDVI*, unitless                                                        | (ref)                    |
| Q1 (0.14, 0.60)                                                        | (ref)                    |
| Q2 (0.60, 0.70)                                                        | <b>0.82 (0.70, 0.98)</b> |
| Q3 (0.70, 0.79)                                                        | 0.91 (0.75, 1.09)        |
| Q4 (0.79, 0.94)                                                        | 0.84 (0.69, 1.02)        |
| <b>Models 2a-d</b>                                                     |                          |
| <b>Sensitivity analyses for UNGD associations with NDVI adjustment</b> |                          |
| Pad preparation**, 1/m <sup>2</sup>                                    | (ref)                    |
| Q1 (4.0 X 10 <sup>-9</sup> , 3.3 X 10 <sup>-8</sup> )                  | (ref)                    |
| Q2 (3.3 X 10 <sup>-8</sup> , 6.2 X 10 <sup>-8</sup> )                  | 1.18 (1.00, 1.39)        |
| Q3 (6.2 X 10 <sup>-8</sup> , 1.2 X 10 <sup>-7</sup> )                  | <b>1.60 (1.33, 1.93)</b> |
| Q4 (1.2 X 10 <sup>-7</sup> , 2.5 X 10 <sup>-5</sup> )                  | <b>1.66 (1.32, 2.08)</b> |
| Spud (drilling)**, 1/m <sup>2</sup>                                    | (ref)                    |
| Q1 (1.9 X 10 <sup>-10</sup> , 2.6 X 10 <sup>-9</sup> )                 | (ref)                    |
| Q2 (2.6 X 10 <sup>-9</sup> , 3.8 X 10 <sup>-9</sup> )                  | 1.00 (0.81, 1.24)        |
| Q3 (3.8 X 10 <sup>-9</sup> , 4.7 X 10 <sup>-8</sup> )                  | 1.08 (0.85, 1.36)        |
| Q4 (4.7 X 10 <sup>-9</sup> , 1.7 X 10 <sup>-8</sup> )                  | 0.96 (0.74, 1.25)        |
| Stimulation**, m/m <sup>2</sup>                                        | (ref)                    |
| Q1 (2.5 X 10 <sup>-6</sup> , 2.7 X 10 <sup>-4</sup> )                  | (ref)                    |
| Q2 (2.7 X 10 <sup>-4</sup> , 5.6 X 10 <sup>-4</sup> )                  | 1.02 (0.80, 1.30)        |
| Q3 (5.6 X 10 <sup>-4</sup> , 9.7 X 10 <sup>-4</sup> )                  | <b>1.54 (1.18, 2.01)</b> |
| Q4 (9.7 X 10 <sup>-4</sup> , 0.2)                                      | <b>1.76 (1.32, 2.35)</b> |
| Production**, m <sup>3</sup> /m <sup>2</sup>                           | (ref)                    |
| Q1 (2.2 X 10 <sup>-6</sup> , 0.002)                                    | (ref)                    |
| Q2 (0.002, 0.02)                                                       | 0.88 (0.65, 1.20)        |
| Q3 (0.02, 0.03)                                                        | <b>1.11 (0.76, 1.62)</b> |
| Q4 (0.03, 16.5)                                                        | <b>1.62 (1.07, 2.45)</b> |

\*Models adjusted for: sex, race/ethnicity, receipt of Medical Assistance, smoking status, BMI (centered and centered-squared), age category, season, contact time, distance to hospital or clinic, year, and region.

\*\*Models included one UNGD metric in separate models and adjusted for: sex, race/ethnicity, receipt of Medical Assistance, smoking status, BMI (centered and centered-squared), age category, season, contact time, distance to hospital or clinic, year, region, and NDVI (centered).

**Supplemental Table 3.** Adjusted associations of a 30-day composite UNGD metric (z-score sum of pad preparation, spud, stimulation, and production phases) with heart failure hospitalization status

| <b>UNGD Metric</b>            | <b>Odds ratio (95% CI)</b> |
|-------------------------------|----------------------------|
| <b>Composite z-score sum*</b> |                            |
| Q1 (-6.93, -6.82)             | (ref)                      |
| Q2 (-6.82, -6.69)             | 0.89 (0.68, 1.18)          |
| Q3 (-6.69, -6.52)             | <b>1.41 (1.04, 1.91)</b>   |
| Q4 (-6.52, 59.22)             | <b>1.49 (1.08, 2.06)</b>   |

\*Models adjusted for: sex, race/ethnicity, receipt of Medical Assistance, smoking status, BMI (centered and centered-squared), age category, season, contact time, distance to hospital or clinic, year, and region.

**Supplemental Figure 1.** Schematic of UNGD activity assignment in relation to events (hospitalizations or control encounters), showing the 30-day duration and the 1-day lag in relation to the date of hospitalization or control encounter

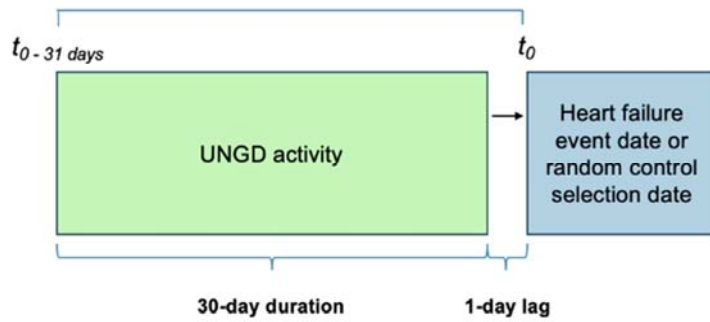

**Supplemental Figure 2.** Plot of linear and quadratic associations between the production metric and predicted probability of hospitalization, with 95 % confidence intervals

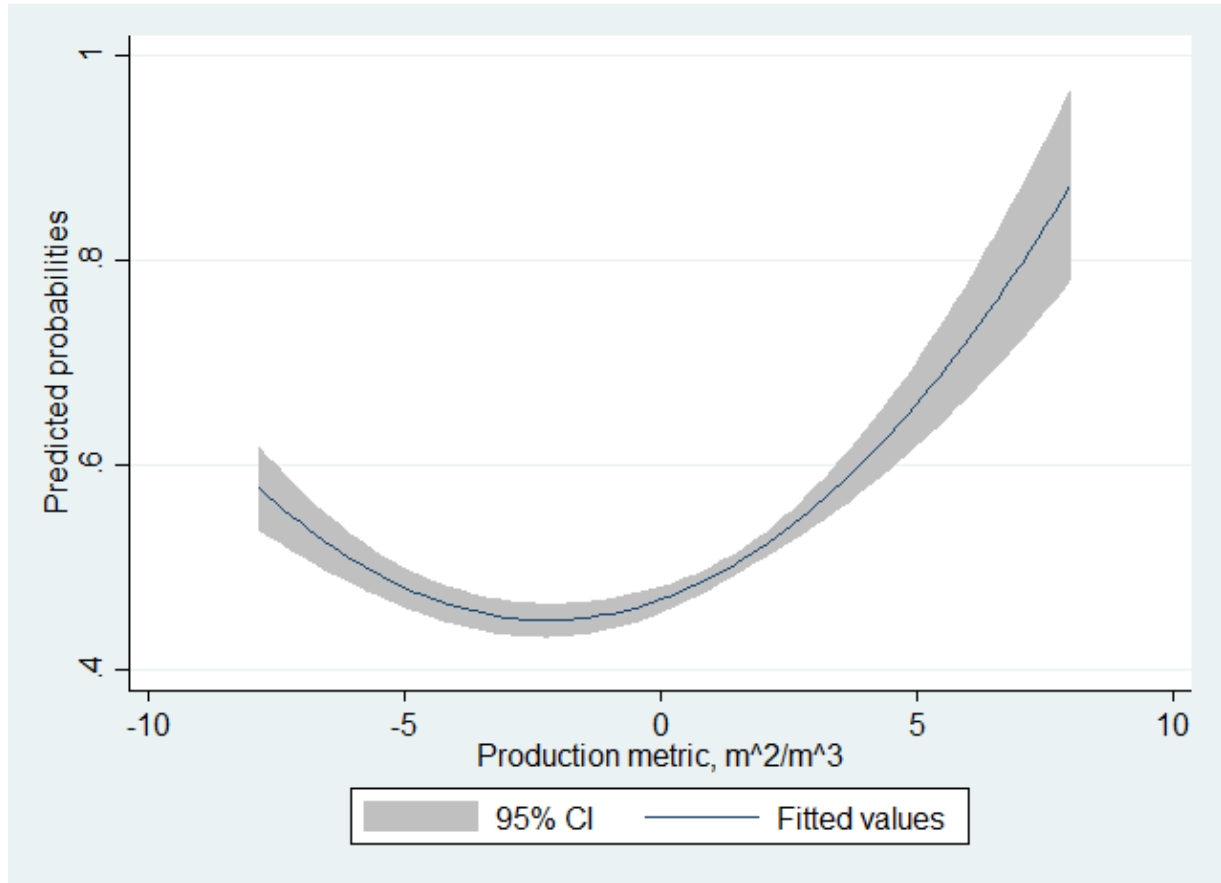

Supplement: NIHMS1638940-supplement-1.pdf [file NIHMS1638940-supplement-1.pdf]
